# Supplementary material for: Evolution of the human pathogenic lifestyle in fungi
Source: Springer Nature journal article supplement (doi:10.1038/s41564-022-01112-0), 2022-05-04

**Supplementary information**

---

**Evolution of the human pathogenic lifestyle  
in fungi**

---

In the format provided by the  
authors and unedited

**Figure S1. Human pathogenicity has repeatedly evolved in fungi.** Genera and lineages harboring major and emerging fungal pathogens (see Table 1) are shown in red and non-pathogenic taxa are shown in black. The fungal tree of life based on a phylogenomic analysis of 1,644 species and 290 genes from Li et al. (2021). A genome-scale phylogeny of the kingdom Fungi. *Curr. Biol.* 31: 1653–1665.

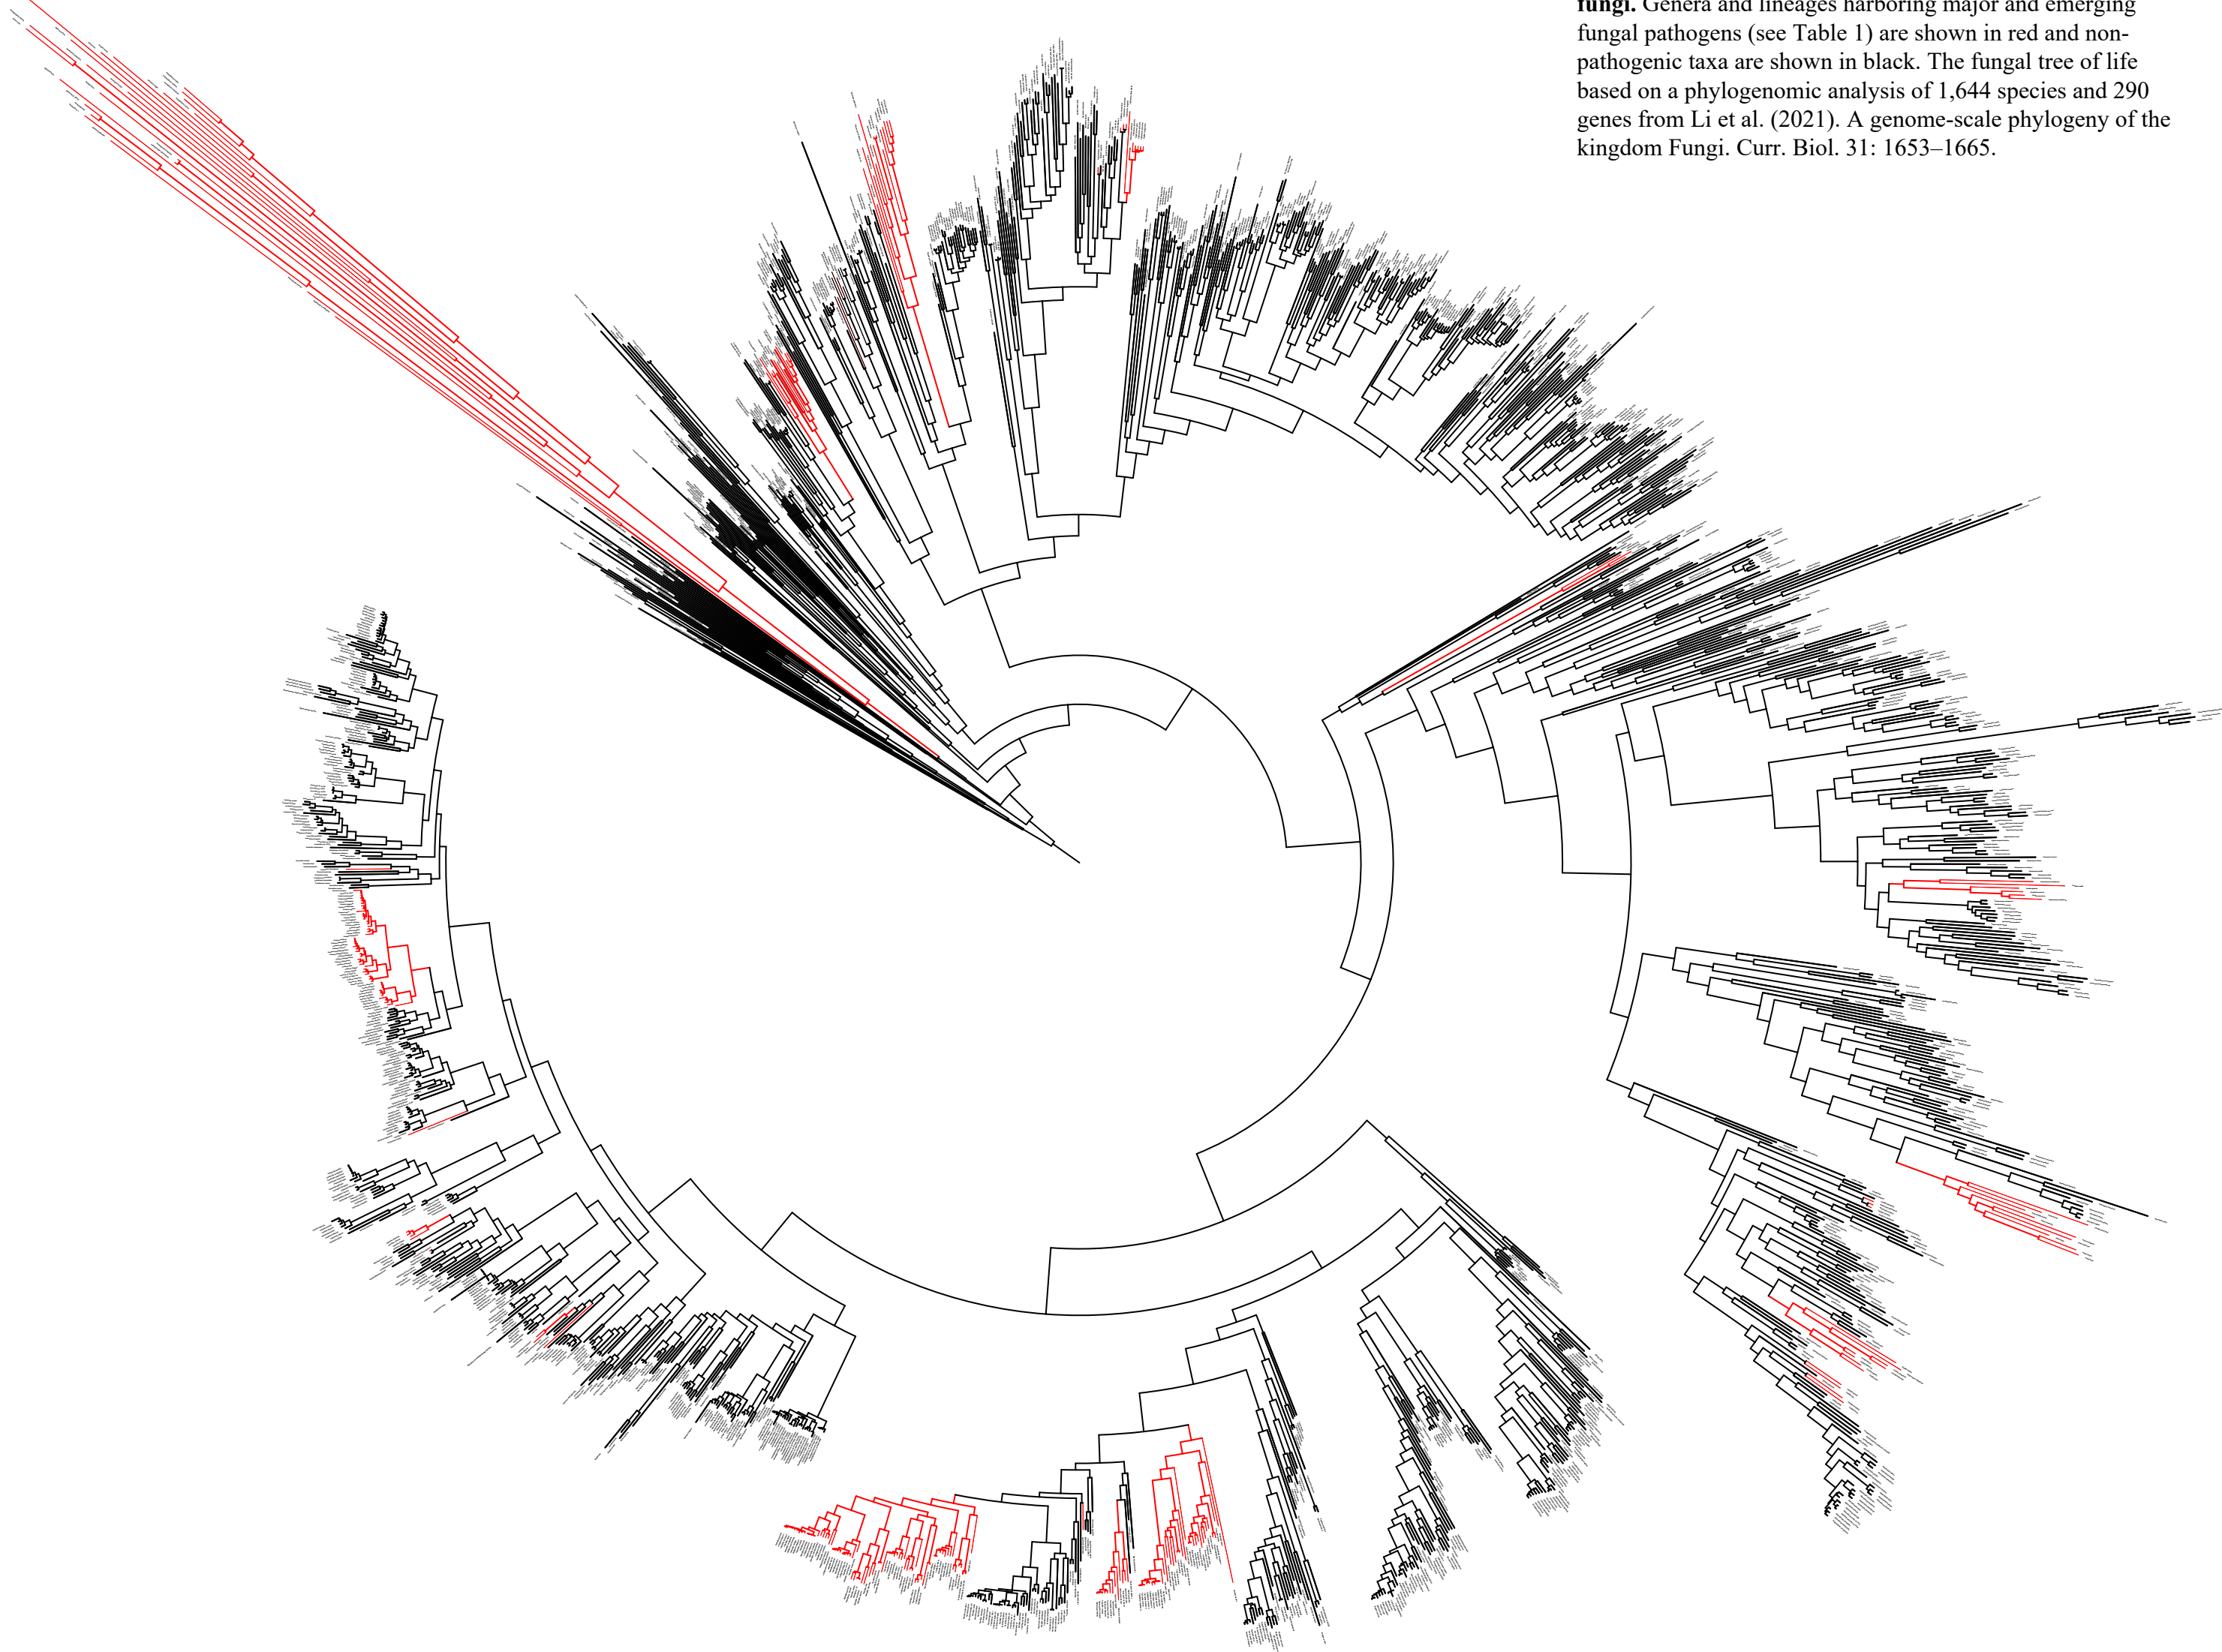

Supplement: 41564_2022_1112_MOESM1_ESM.pdf [file 41564_2022_1112_MOESM1_ESM.pdf]
